# Supplementary material
Source: Research Square preprint supplement (doi:10.21203/rs.3.rs-9264545/v1)

**
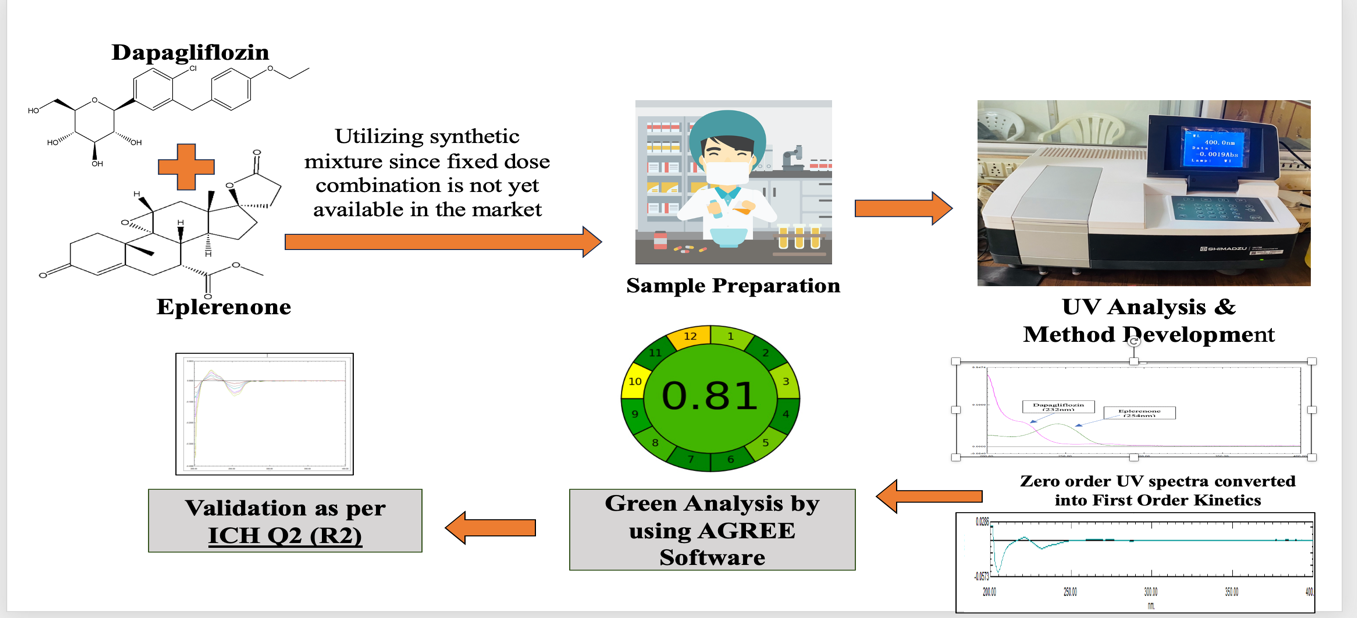
**

Supplement: Supplementary file 1 [file 9513e8e4cca2d3ad434b25b9.docx]
